# Supplementary material for: Association between Abdominal Aortic Calcification and Coronary Heart Disease in Essential Hypertension: A Cross-Sectional Study from the 2013–2014 National Health and Nutrition Examination Survey
Source: MDPI journal article supplement (doi:10.3390/jcdd11050143), 2024-05-02
Supplement: s1 [file s1]

**Table S1:** Definition and grading of hypertension

| Defining characteristic                          | The grade of hypertension                                              | Cases |
|--------------------------------------------------|------------------------------------------------------------------------|-------|
| The average of three blood pressure measurements | Grade 1: $40 \leq \text{SBP} < 160$ and/or $90 \leq \text{DBP} < 100$  | 488   |
|                                                  | Grade 2: $60 \leq \text{SBP} < 180$ and/or $100 \leq \text{DBP} < 110$ | 130   |
|                                                  | Grade 3: $0 \leq \text{SBP}$ and/or $110 \leq \text{DBP}$              | 41    |
| Self-reported hypertension                       | Not applicable                                                         | 906   |

**Table S2:** The association between AAC and CHD after stratification by the grade of hypertension.

| AAC score                     | Grade 1         | Grade 2          | Grade 3           |
|-------------------------------|-----------------|------------------|-------------------|
|                               | OR (95% CI)     | OR (95% CI)      | OR (95% CI)       |
| Continuous per score increase | 1.08(1.09-1.17) | 1.12(1.02-1.23)  | 1.15(1.04-1.38)   |
| Categorical per unit increase |                 |                  |                   |
| Without AAC (0)               | 1(Ref.)         | 1(Ref.)          | 1(Ref.)           |
| Mild AAC (1-4)                | 1.84(0.77-4.39) | 1.90(0.39-9.09)  | 2.44(0.61-1.88)   |
| Moderate AAC (5-15)           | 2.25(1.87-5.81) | 4.12(1.11-16.84) | 5.55(1.48-25.67)  |
| Severe AAC (6-24)             | 4.05(2.81-20.3) | 8.25(1.24-59.04) | 16.82(1.57-85.01) |

Model adjusted for age, sex, ethnicity, BMI, pulse, drinking, smoking, DM, RBC, WBC, platelets, albumin, creatinine, triglyceride, LDL-C, and HDL-C.
